# Supplementary material
Source: PubMed Central journal article supplement (PMC8370721)

Figure S3(rev)

[Click here to download Supplementary Material \(for online publication\): New Fig. S3 \(1\).pdf](#)

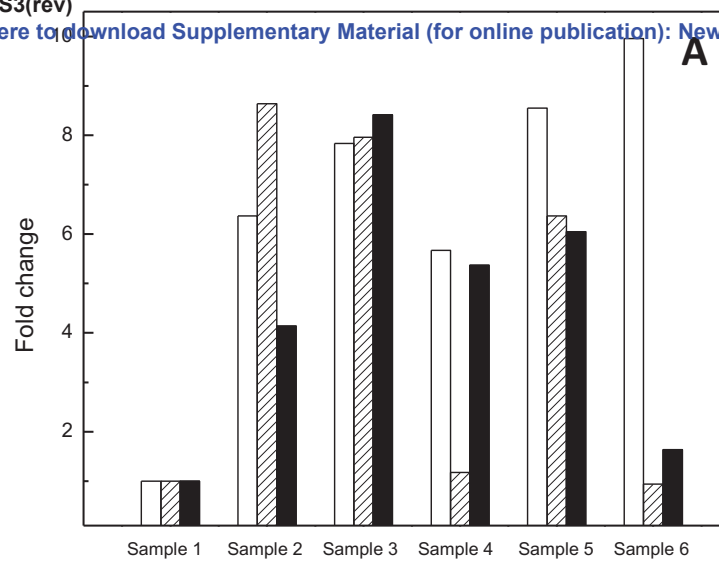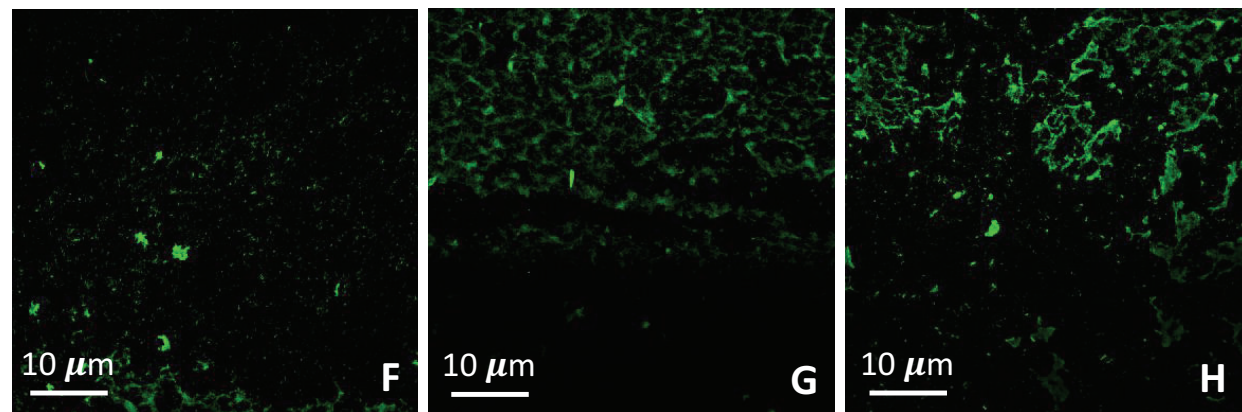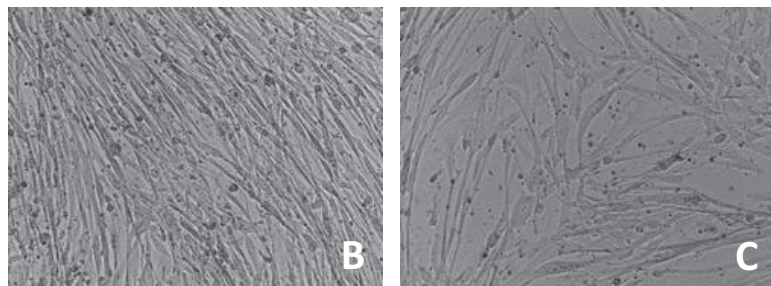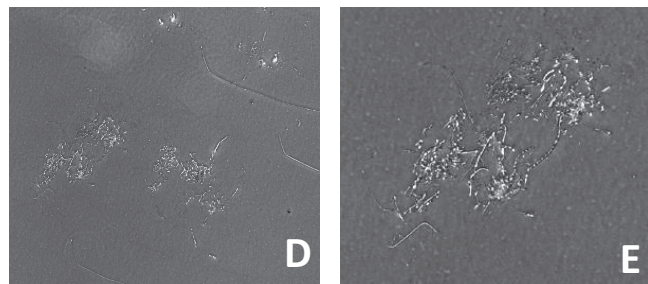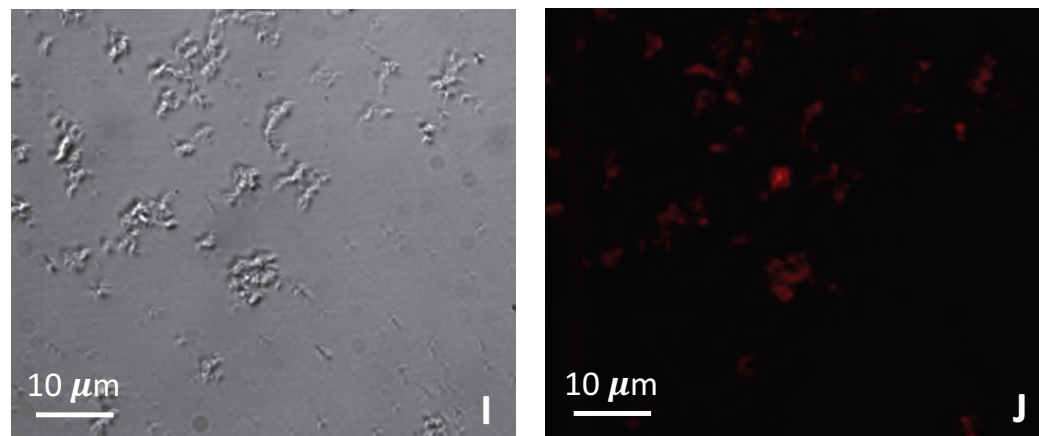

Supplement: NIHMS1732535-supplement-FIG_S3.pdf [file NIHMS1732535-supplement-FIG_S3.pdf]
