# Supplementary material
Source: PubMed Central journal article supplement (PMC8370721)

**Figure S1**

[Click here to download Supplementary Material \(for online publication\): Figure S1.pdf](#)

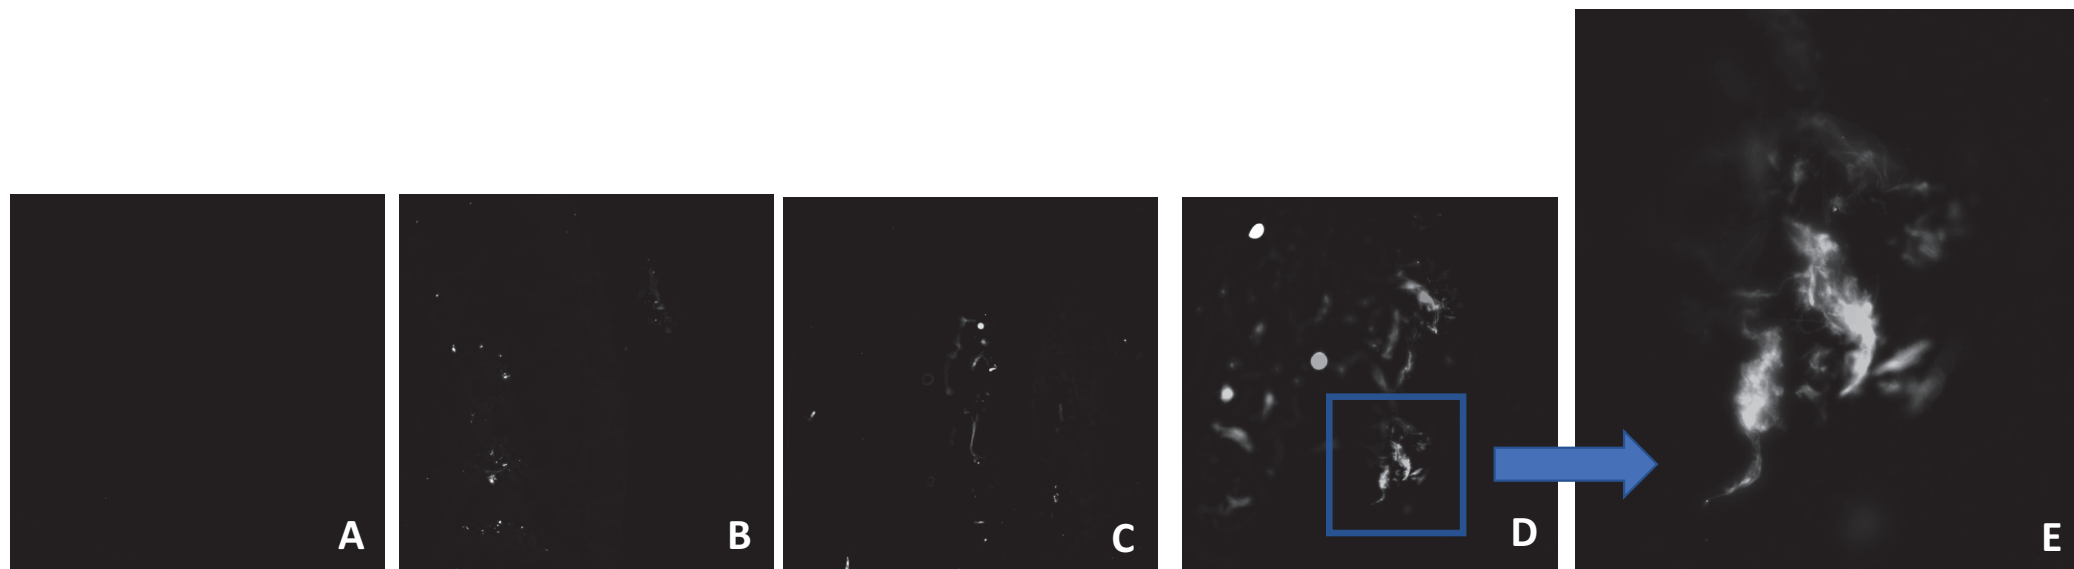

Supplement: NIHMS1732535-supplement-FIG_S1.pdf [file NIHMS1732535-supplement-FIG_S1.pdf]

**Figure S2**

[Click here to download Supplementary Material \(for online publication\): Figure S2.pdf](#)

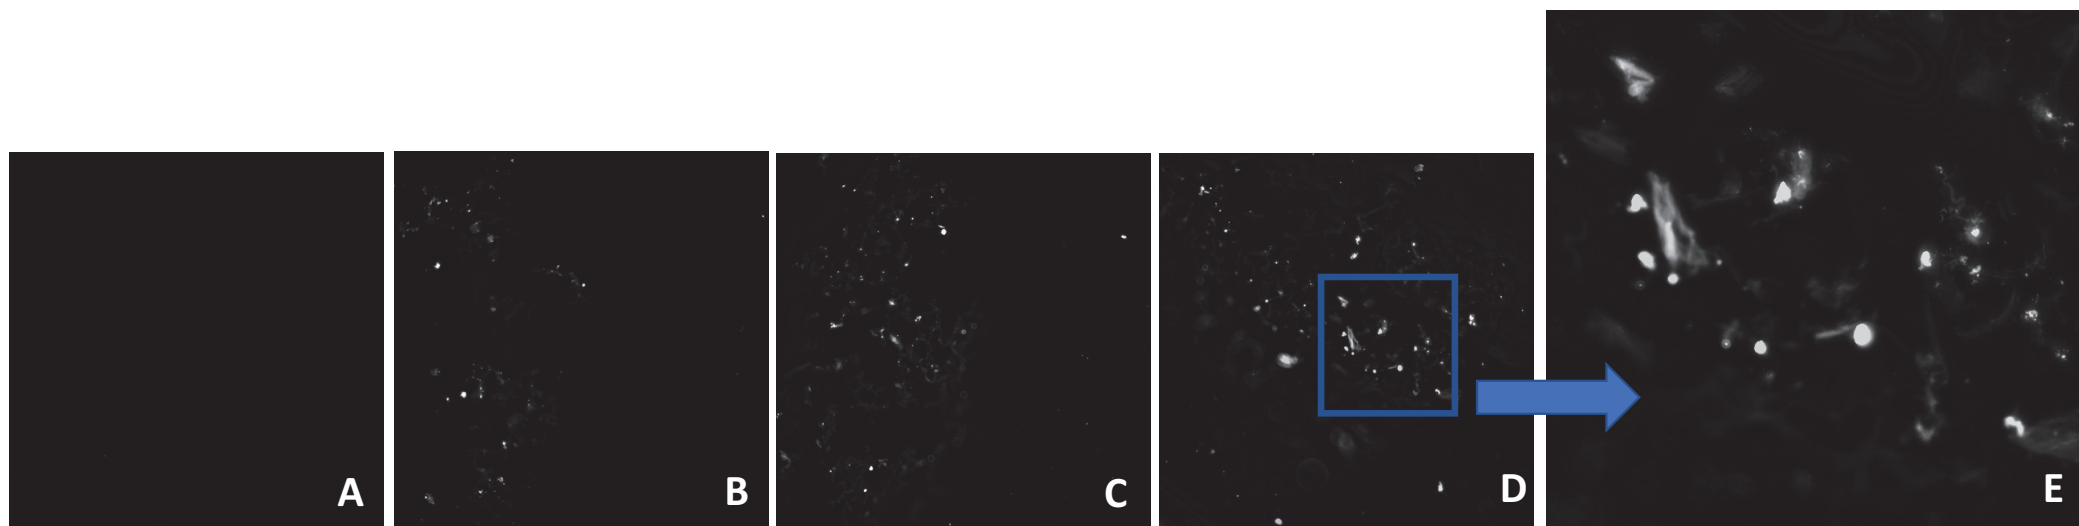

Supplement: NIHMS1732535-supplement-FIG_S2.pdf [file NIHMS1732535-supplement-FIG_S2.pdf]
